# Supplementary material
Source: publisher figshare collection journal article supplement (https://sage.figshare.com/ndownloader/files/18109850)
Supplement: Supplementary file 1 [file 18109850]

| **Supplementary table 1. Drop-out analysis comparing those not available to those who completed the BPD, depression, psychotic, and hypomania symptoms questionnaire** | | | |
| --- | --- | --- | --- |
| Predictors | Completed questionnaire  N (%) | Did not complete questionnaire  N (%) | Non-response versus response  OR (95% CI) |
| Gender |  |  |  |
| Male | 646 (9.0%) | 6571 (91.0%) | [reference] |
| Female | 1133 (16.8%) | 5622 (83.2%) | **2.05 (1.85, 2.27)** |
| Birthweight |  |  |  |
| >2499g | 1680 (95.7%) | 11365 (94.4%) | [reference] |
| <2500g | 76 (4.3%) | 671 (5.6%) | **0.70 (0.55, 0.90)** |
| Family adversity  (Mean score) | 3.22 (3.53) | 4.17 (4.16) | **0.94 (0.92, 0.95)** |
| Physical abuse |  |  |  |
| No | 1587 (89.6%) | 9200 (90.6%) | [reference] |
| Yes | 185 (9.4%) | 983 (10.4%) | 1.12 (0.95, 1.33) |
| Sexual abuse |  |  |  |
| No | 1765 (99.5%) | 10107 (99.6%) | [reference] |
| Yes | 7 (0.5%) | 46 (0.4%) | 0.90 (0.41, 1.99) |
| Maternal hitting |  |  |  |
| No | 894 (51.4%) | 4905 (54.9%) | [reference] |
| Yes | 846 (48.6%) | 4548 (48.1%) | 1.02 (0.92, 1.13) |
| Maternal shouting |  |  |  |
| No | 953 (54.8%) | 5096 (53.8%) | [reference] |
| Yes | 787 (45.2%) | 4371 (46.2%) | 0.96 (0.87, 1.06) |
| OR: Odds Ratio; CI: Confidence Intervals; Significant results presented in bold type face. Family adversity assessed with the family adversity index which comprises 18 items (see Winsper et al. 2012 for more details). | | | |

| **Table S2. Associations between individual BPD symptoms psychopathological outcomes in late adolescence/early adulthood** | | | | | | |
| --- | --- | --- | --- | --- | --- | --- |
| **Individual BPD symptoms** | **Depression at 18 years** | | **Psychotic symptoms at 18 years** | | **Hypomanic symptoms at 22-23 years** | |
|  | Odds Ratio (95% CIs) | | Odds Ratio (95% CIs) | | Odds Ratio (95% CIs) | |
|  | Unadjusted | Adjusted | Unadjusted | Adjusted | Unadjusted | Adjusted |
| Anger | **1.69 (1.14, 2.51)** | **1.56 (1.05, 2.34)** | **2.13 (1.23, 3.70)** | **2.06 (1.19, 3.59)** | 1.31 (0.90, 1.91) | 1.29 (0.88, 1.90) |
| Affective instability | **1.94 (1.30, 2.89)** | **1.83 (1.22, 2.74)** | **3.25 (1.90, 5.57)** | **3.23 (1.88, 5.55)** | **1.65 (1.14, 2.39)** | **1.60 (1.10, 2.33)** |
| Emptiness | **2.03 (1.16, 3.55)** | **1.78 (1.01, 3.15)** | **3.59 (1.85, 6.96)** | **3.44 (1.76, 6.72)** | **1.88 (1.12, 3.16)** | **1.75 (1.04, 2.96)** |
| Identity disturbance | 1.53 (0.85, 2.74) | 1.33 (0.73, 2.41) | 1.90 (0.88, 4.10) | 1.80 (0.83, 3.92) | 1.67 (1.00, 2.79) | 1.54 (0.91, 2.60) |
| Paranoid ideation | 1.58 (0.96, 2.59) | 1.48 (0.90, 2.43) | **2.71 (1.48, 4.97)** | **2.63 (1.43, 4.85)** | 1.22 (0.76, 1.97) | **1.17 (0.92, 1.75)** |
| Fear of abandonment | 1.68 (0.92, 3.08) | 1.43 (0.76, 2.69) | **2.64 (1.26, 5.51)** | **2.52 (1.20, 5.30)** | **1.89 (1.12, 3.22)** | **1.96 (1.14, 3.36)** |
| Suicide ideation | 0.39 (0.09, 1.60) | 0.31 (0.07, 1.40) | **3.61 (1.58, 8.27)** | **3.52 (1.53, 8.12)** | **2.48 (1.33, 4.63)** | **2.46 (1.30, 4.67)** |
| Impulsivity | **1.88 (1.23, 2.90)** | **1.85 (1.20, 2.86)** | **2.45 (1.38, 4.34)** | **2.28 (1.28, 4.06)** | 1.49 (0.99, 2.23) | **1.53 (1.01, 2.30)** |
| Unstable relationships | 1.36 (0.82, 2.28) | 1.27 (0.75, 2.13) | **2.15 (1.14, 4.06)** | **2.03 (1.07, 3.86)** | 1.33 (0.84, 2.10) | 1.18 (0.73, 1.90) |
| Significant associations in boldface; Results reported in Odds Ratios with 95% Confidence Intervals: adjusted associations for child gender, family adversity, physical abuse and sexual abuse | | | | | | |
